# Supplementary material
Source: MDPI journal article supplement (https://www.mdpi.com/2673-4540/5/1/8)
Supplement: s1 [file s1]

## Supplementary Tables and Figures

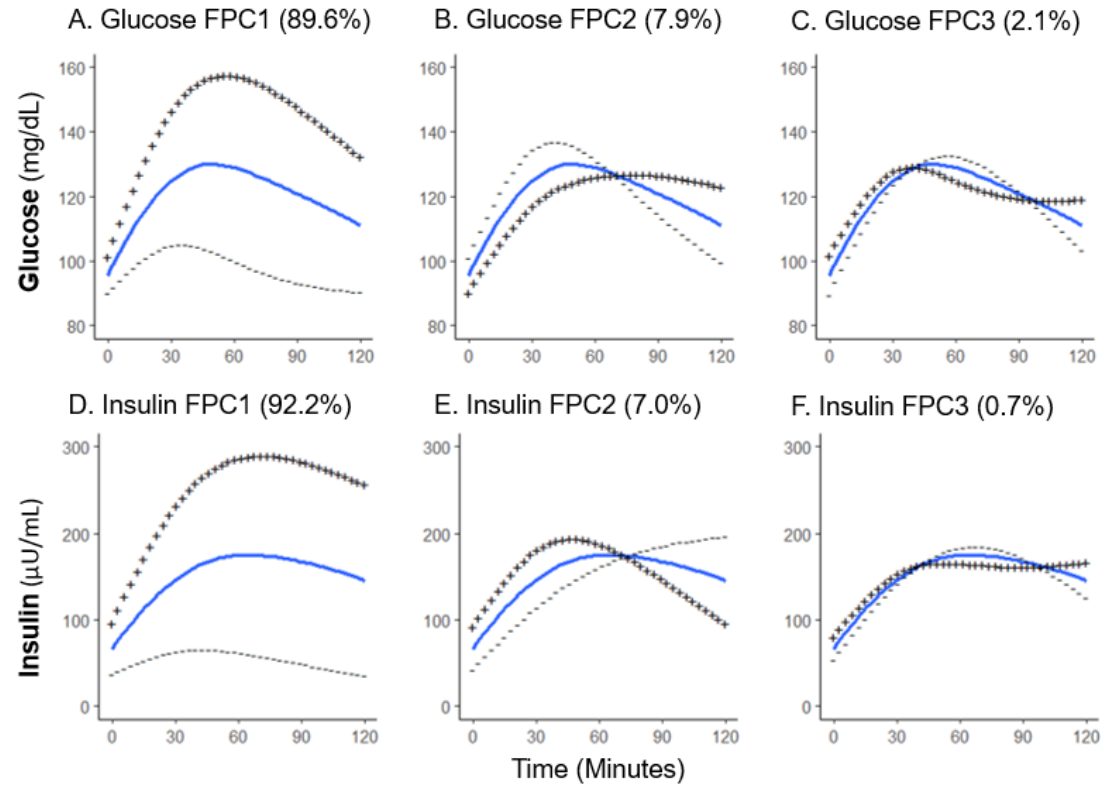

**Figure S1. Fitted FPC curves for glucose and insulin (% variance explained).** Fitted curves are shown for average glucose (A-C) and insulin (D-F) FPCs with +/- curves indicating the fitted curve for one standard deviation +/- the mean score for each FPC (error designation calculated as in Frøslie et al. [20]). Percent variance explained is the proportion of variance in fitted curves for each participant explained by each FPC. Abbreviations: FPC, functional principal component.

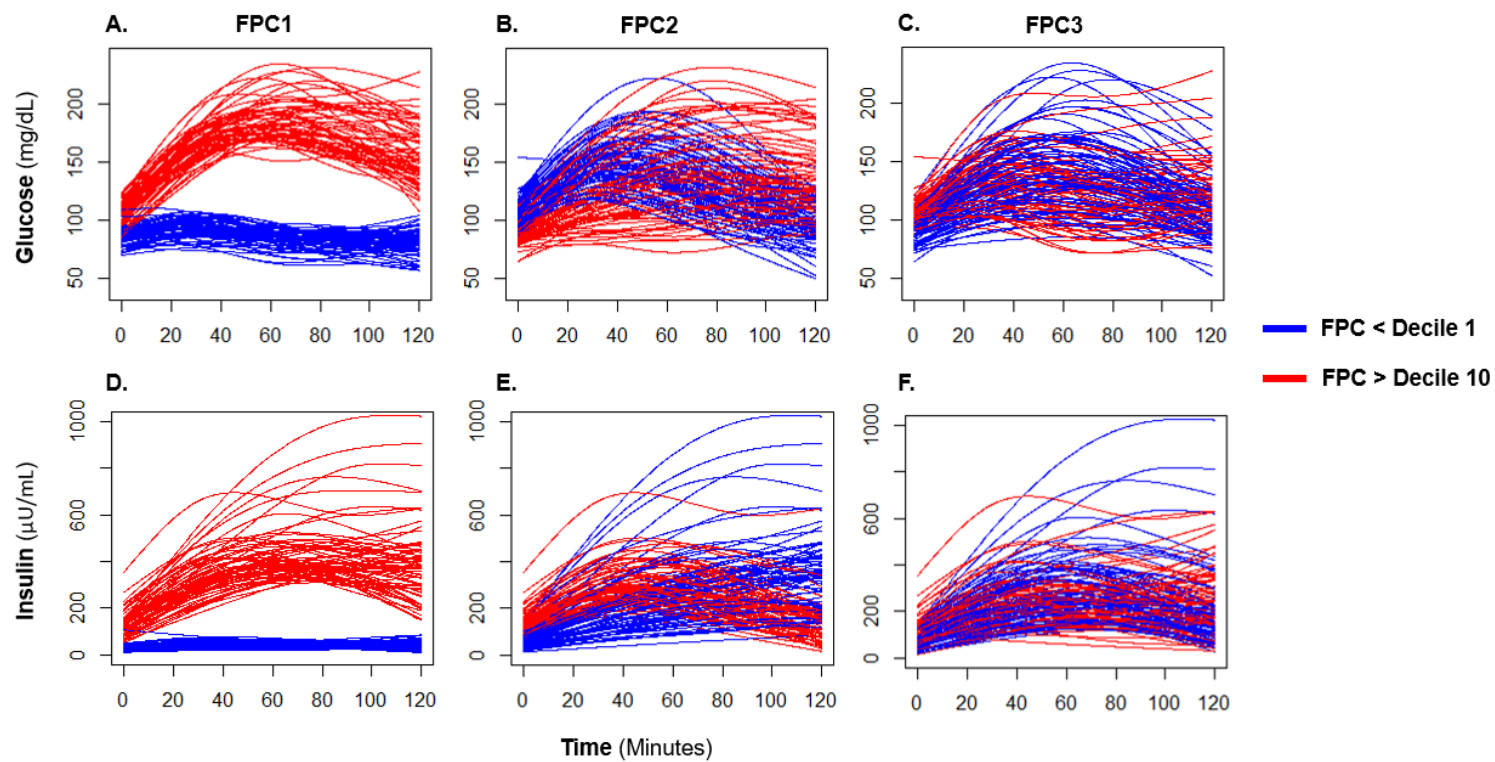

**Figure S2. Curves from extreme deciles of each FPC.** Fitted curves are shown from participants from extreme deciles of the three glucose (A-C) and insulin (D-F) FPCs. Participants with extreme values were selected separately for each FPC, so the subset of participants included in each plot is not the same. Abbreviations: FPC, functional principal component.

**Table S1. Metabolic health parameters by shape classification (cross-sectional)**

| <b>Characteristic</b>            | <b>Monophasic, n = 368<sup>1</sup></b> | <b>Biphasic, n = 282<sup>1</sup></b> | <b>Incessant Increase, n = 17<sup>1</sup></b> | <b>p-value<sup>2</sup></b> |
|----------------------------------|----------------------------------------|--------------------------------------|-----------------------------------------------|----------------------------|
| <b>Age (Years)</b>               | 13.7 [12.1, 15.5]                      | 12.8 [11.2, 15.0]                    | 14.6 [11.7, 15.69]                            | <b>&lt;0.001</b>           |
| <b>Sex</b>                       |                                        |                                      |                                               | 0.174                      |
| Female                           | 188 (52%)                              | 159 (44%)                            | 12 (3.3%)                                     |                            |
| Male                             | 179 (58%)                              | 123 (40%)                            | 5 (1.6%)                                      |                            |
| <b>Race</b>                      |                                        |                                      |                                               | 0.272                      |
| White                            | 225 (59%)                              | 152 (40%)                            | 7 (1.8%)                                      |                            |
| Black or African American        | 107 (51%)                              | 95 (45%)                             | 7 (3.3%)                                      |                            |
| Other/Multiracial                | 25 (48%)                               | 25 (48%)                             | 2 (3.8%)                                      |                            |
| Unknown/Not Reported             | 10 (48%)                               | 10 (48%)                             | 1 (4.7%)                                      |                            |
| <b>Ethnicity</b>                 |                                        |                                      |                                               | <b>0.034</b>               |
| Non-Hispanic/Latino              | 342 (55%)                              | 271 (43%)                            | 14 (2.2%)                                     |                            |
| Hispanic/Latino                  | 25 (64%)                               | 11 (28%)                             | 3 (7.7%)                                      |                            |
| <b>BMI Percentile</b>            | 97.3 [94.7, 98.9]                      | 96.8 [93.4, 98.6]                    | 96.6 [94.6, 97.8]                             | 0.051                      |
| <b>Waist Circumference (cm)</b>  | 93 [85, 104]                           | 88 [80, 98]                          | 85 [81, 94]                                   | <b>&lt;0.001</b>           |
| <b>Systolic BP (mmHg)</b>        | 115 [107, 124]                         | 112 [106, 121]                       | 113 [106, 115]                                | <b>0.037</b>               |
| <b>Diastolic BP (mmHg)</b>       | 63 [59, 68]                            | 62 [58, 67]                          | 63 [60, 68]                                   | 0.567                      |
| <b>HbA1c (%)</b>                 | 5.4 [5.1, 5.7]                         | 5.3 [5.1, 5.6]                       | 5.6 [5.1, 5.7]                                | 0.143                      |
| <b>Total Cholesterol (mg/dL)</b> | 147 [128, 168]                         | 147 [126, 166]                       | 153 [133, 181]                                | 0.561                      |
| <b>HDL Cholesterol (mg/dL)</b>   | 42 [36, 50]                            | 44 [36, 53]                          | 44 [34, 57]                                   | 0.181                      |
| <b>LDL Cholesterol (mg/dL)</b>   | 95 [79, 115]                           | 93 [76, 112]                         | 103 [81, 111]                                 | 0.339                      |
| <b>Triglycerides (mg/dL)</b>     | 79 [56, 109]                           | 70 [50, 102]                         | 93 [65, 115]                                  | <b>0.017</b>               |
| <b>FPG (mg/dL)</b>               | 89 [83, 95]                            | 88 [82, 95]                          | 83 [81, 88]                                   | 0.214                      |
| <b>2hrPG (mg/dL)</b>             | 107 [92, 125]                          | 108 [96, 124]                        | 131 [119, 144]                                | <b>&lt;0.001</b>           |

Abbreviations: BMI, body mass index; BP, blood pressure; HbA1c, hemoglobin A1c; HDL, high-density lipoprotein; LDL, low-density lipoprotein; FPG, fasting plasma glucose; 2hrPG, 2-hour plasma glucose; Q1, 1<sup>st</sup> quartile; Q3, 3<sup>rd</sup> quartile.

1. Median [Q1, Q3]; n (%); shape classifications were undetermined for five participants. Variable-specific missingness existed for BP (n = 21), waist circumference (n = 24), and lipid labs (n = 10).

2. Kruskal-Wallis test (continuous characteristics) or Fisher's exact test (categorical characteristics).

**Table S2. Univariate linear regression of standardized glucose FPCs by demographic characteristics (cross-sectional)**

| Characteristic<br>(Independent Variable) <sup>1</sup> | Dependent Variable |              |                  |                |              |              |                  |                |              |              |              |                |
|-------------------------------------------------------|--------------------|--------------|------------------|----------------|--------------|--------------|------------------|----------------|--------------|--------------|--------------|----------------|
|                                                       | Glucose FPC1       |              |                  |                | Glucose FPC2 |              |                  |                | Glucose FPC3 |              |              |                |
|                                                       | Beta               | 95% CI       | p-value          | R <sup>2</sup> | Beta         | 95% CI       | p-value          | R <sup>2</sup> | Beta         | 95% CI       | p-value      | R <sup>2</sup> |
| <b>Age (Years)<sup>2</sup></b>                        | -0.02              | -0.05, 0.01  | 0.247            | 0.002          | -0.02        | -0.06, 0.01  | 0.154            | 0.003          | -0.05        | -0.08, -0.02 | <b>0.002</b> | 0.014          |
| <b>Sex<sup>3</sup></b>                                |                    |              |                  | 0.006          |              |              |                  | 0.036          |              |              |              | 0.000          |
| <i>Female</i>                                         | —                  | —            |                  |                | —            | —            |                  |                | —            | —            |              |                |
| <i>Male</i>                                           | 0.15               | 0.00, 0.30   | 0.054            |                | -0.38        | -0.53, -0.23 | <b>&lt;0.001</b> |                | 0.00         | -0.16, 0.15  | 0.951        |                |
| <b>Race<sup>3</sup></b>                               |                    |              |                  | 0.025          |              |              |                  | 0.052          |              |              |              | 0.003          |
| <i>White</i>                                          | —                  | —            |                  |                | —            | —            |                  |                | —            | —            |              |                |
| <i>Black or African American</i>                      | -0.30              | -0.47, -0.13 | <b>&lt;0.001</b> |                | 0.50         | 0.34, 0.66   | <b>&lt;0.001</b> |                | -0.06        | -0.23, 0.11  | 0.503        |                |
| <i>Other/Multiracial</i>                              | -0.37              | -0.66, -0.08 | <b>0.012</b>     |                | 0.26         | -0.02, 0.55  | 0.068            |                | -0.13        | -0.42, 0.16  | 0.363        |                |
| <i>Unknown/Not Reported</i>                           | 0.10               | -0.34, 0.53  | 0.656            |                | 0.12         | -0.31, 0.55  | 0.571            |                | 0.18         | -0.26, 0.62  | 0.434        |                |
| <b>Ethnicity<sup>3</sup></b>                          |                    |              |                  | 0.003          |              |              |                  | 0.000          |              |              |              | 0.000          |
| <i>Non-Hispanic/Latino</i>                            | —                  | —            |                  |                | —            | —            |                  |                | —            | —            |              |                |
| <i>Hispanic/Latino</i>                                | 0.22               | -0.10, 0.54  | 0.185            |                | 0.03         | -0.29, 0.36  | 0.839            |                | -0.03        | -0.35, 0.29  | 0.856        |                |

Abbreviations: FPC, functional principal component; CI, confidence interval.

1. Each independent variable (rows) and FPC (columns) combination represents a separate univariable linear regression model.
2. Betas are interpreted as the standard deviation difference in each glucose FPC per each additional year of age.
3. Betas are interpreted as the standard deviation difference in each glucose FPC associated with each category relative to the reference level.

Table S3. Univariate linear regression of standardized insulin FPCs by demographic characteristics (cross-sectional)

| Characteristic<br>(Independent Variable) <sup>1</sup> | Dependent Variable |              |                  |                |              |             |              |                |              |              |              |                |
|-------------------------------------------------------|--------------------|--------------|------------------|----------------|--------------|-------------|--------------|----------------|--------------|--------------|--------------|----------------|
|                                                       | Insulin FPC1       |              |                  |                | Insulin FPC2 |             |              |                | Insulin FPC3 |              |              |                |
|                                                       | Beta               | 95% CI       | p-value          | R <sup>2</sup> | Beta         | 95% CI      | p-value      | R <sup>2</sup> | Beta         | 95% CI       | p-value      | R <sup>2</sup> |
| <b>Age (Years)<sup>2</sup></b>                        | 0.00               | -0.03, 0.03  | 0.908            | 0.000          | 0.02         | -0.01, 0.05 | 0.172        | 0.003          | -0.05        | -0.08, -0.01 | <b>0.004</b> | 0.012          |
| <b>Sex<sup>3</sup></b>                                |                    |              |                  | 0.017          |              |             |              | 0.013          |              |              |              | 0.008          |
| <i>Female</i>                                         | —                  | —            |                  |                | —            | —           |              |                | —            | —            |              |                |
| <i>Male</i>                                           | -0.26              | -0.41, -0.11 | <b>&lt;0.001</b> |                | 0.23         | 0.07, 0.38  | <b>0.003</b> |                | -0.18        | -0.33, -0.03 | <b>0.022</b> |                |
| <b>Race<sup>3</sup></b>                               |                    |              |                  | 0.002          |              |             |              | 0.012          |              |              |              | 0.012          |
| <i>White</i>                                          | —                  | —            |                  |                | —            | —           |              |                | —            | —            |              |                |
| <i>Black or African American</i>                      | 0.08               | -0.08, 0.25  | 0.327            |                | 0.17         | 0.01, 0.34  | <b>0.042</b> |                | 0.19         | 0.02, 0.36   | <b>0.025</b> |                |
| <i>Other/Multiracial</i>                              | 0.14               | -0.15, 0.43  | 0.339            |                | 0.05         | -0.23, 0.34 | 0.712        |                | 0.22         | -0.07, 0.51  | 0.132        |                |
| <i>Unknown/Not Reported</i>                           | -0.02              | -0.46, 0.42  | 0.937            |                | -0.37        | -0.81, 0.07 | 0.098        |                | 0.38         | -0.06, 0.82  | 0.087        |                |
| <b>Ethnicity<sup>3</sup></b>                          |                    |              |                  | 0.002          |              |             |              | 0.000          |              |              |              | 0.000          |
| <i>Non-Hispanic/Latino</i>                            | —                  | —            |                  |                | —            | —           |              |                | —            | —            |              |                |
| <i>Hispanic/Latino</i>                                | 0.20               | -0.12, 0.53  | 0.220            |                | -0.08        | -0.41, 0.24 | 0.613        |                | -0.09        | -0.42, 0.23  | 0.576        |                |

Abbreviations: FPC, functional principal component; CI, confidence interval.

1. Each independent variable (rows) and FPC (columns) combination represents a separate univariable linear regression model.
2. Betas are interpreted as the standard deviation difference in each insulin FPC per each additional year of age.
3. Betas are interpreted as the standard deviation difference in each insulin FPC associated with each category relative to the reference level.

Table S4. Adjusted linear regression models of standardized glucose FPCs by metabolic health parameters (cross-sectional)

| Independent Variable             | Dependent Variable        |               |         |                         |                           |                |         |                         |                           |                |         |                         |
|----------------------------------|---------------------------|---------------|---------|-------------------------|---------------------------|----------------|---------|-------------------------|---------------------------|----------------|---------|-------------------------|
|                                  | Glucose FPC1 <sup>1</sup> |               |         |                         | Glucose FPC2 <sup>1</sup> |                |         |                         | Glucose FPC3 <sup>1</sup> |                |         |                         |
|                                  | Beta                      | 95% CI        | p-value | Adjusted R <sup>2</sup> | Beta                      | 95% CI         | p-value | Adjusted R <sup>2</sup> | Beta                      | 95% CI         | p-value | Adjusted R <sup>2</sup> |
| BMI Percentile                   | 0.061                     | 0.042, 0.081  | <0.001  | 0.076                   | 0.015                     | -0.004, 0.035  | 0.128   | 0.077                   | -0.003                    | -0.023, 0.017  | 0.785   | 0.007                   |
| Waist Circumference (cm)         | 0.010                     | 0.004, 0.015  | 0.001   | 0.040                   | 0.006                     | 0.000, 0.011   | 0.038   | 0.079                   | -0.004                    | -0.010, 0.002  | 0.155   | 0.010                   |
| Systolic BP (per 10 mmHg)        | 0.054                     | -0.011, 0.120 | 0.106   | 0.028                   | -0.036                    | -0.100, 0.029  | 0.278   | 0.070                   | -0.066                    | -0.132, -0.001 | 0.048   | 0.014                   |
| Diastolic BP (per 10 mmHg)       | 0.116                     | 0.010, 0.221  | 0.031   | 0.032                   | -0.095                    | -0.198, 0.008  | 0.070   | 0.074                   | -0.057                    | -0.163, 0.048  | 0.286   | 0.010                   |
| HbA1c (%)                        | 0.733                     | 0.557, 0.908  | <0.001  | 0.113                   | 0.060                     | -0.120, 0.239  | 0.514   | 0.075                   | 0.280                     | 0.095, 0.465   | 0.003   | 0.020                   |
| FPG (per 10 mg/dL)               | 0.485                     | 0.414, 0.557  | <0.001  | 0.229                   | -0.297                    | -0.372, -0.221 | <0.001  | 0.151                   | 0.572                     | 0.503, 0.640   | <0.001  | 0.293                   |
| 2hrPG (per 10 mg/dL)             | 0.319                     | 0.301, 0.336  | <0.001  | 0.665                   | 0.169                     | 0.143, 0.195   | <0.001  | 0.255                   | 0.136                     | 0.107, 0.164   | <0.001  | 0.123                   |
| Triglycerides (per 10 mg/dL)     | 0.044                     | 0.027, 0.062  | <0.001  | 0.059                   | 0.013                     | -0.005, 0.030  | 0.147   | 0.079                   | -0.003                    | -0.021, 0.016  | 0.783   | 0.007                   |
| HDL Cholesterol (per 10 mg/dL)   | 0.122                     | 0.059, 0.185  | <0.001  | 0.045                   | -0.020                    | -0.082, 0.042  | 0.525   | 0.076                   | 0.169                     | 0.106, 0.232   | <0.001  | 0.047                   |
| LDL Cholesterol (per 10 mg/dL)   | 0.043                     | 0.014, 0.071  | 0.004   | 0.037                   | 0.015                     | -0.013, 0.043  | 0.290   | 0.077                   | 0.007                     | -0.022, 0.036  | 0.644   | 0.007                   |
| Total Cholesterol (per 10 mg/dL) | 0.052                     | 0.026, 0.077  | <0.001  | 0.047                   | 0.006                     | -0.019, 0.032  | 0.627   | 0.076                   | 0.027                     | 0.001, 0.053   | 0.043   | 0.013                   |

Abbreviations: BMI, body mass index; BP, blood pressure; HbA1c, hemoglobin A1c; HDL, high-density lipoprotein; LDL, low-density lipoprotein; FPG, fasting plasma glucose; 2hrPG, 2-hour plasma glucose.

1. Model adjusted for age, sex, race, and ethnicity. Each independent variable (rows) and FPC (columns) combination represents a distinct regression model. Betas are interpreted as adjusted increase in each glucose FPC per unit (or 10 unit) change in the metabolic health parameter. Variable-specific missingness existed for BP (n = 21), waist circumference (n = 24), and lipid labs (n = 10).

Table S5. Adjusted linear regression models of standardized insulin FPCs by metabolic health parameters (cross-sectional)

| Independent Variable             | Dependent Variable        |                |              |                         |                           |                |              |                         |                           |               |         |                         |
|----------------------------------|---------------------------|----------------|--------------|-------------------------|---------------------------|----------------|--------------|-------------------------|---------------------------|---------------|---------|-------------------------|
|                                  | Insulin FPC1 <sup>1</sup> |                |              |                         | Insulin FPC2 <sup>1</sup> |                |              |                         | Insulin FPC3 <sup>1</sup> |               |         |                         |
|                                  | Beta                      | 95% CI         | p-value      | Adjusted R <sup>2</sup> | Beta                      | 95% CI         | p-value      | Adjusted R <sup>2</sup> | Beta                      | 95% CI        | p-value | Adjusted R <sup>2</sup> |
| BMI Percentile                   | 0.106                     | 0.087, 0.124   | <0.001       | 0.169                   | 0.015                     | -0.005, 0.035  | 0.150        | 0.023                   | 0.017                     | -0.003, 0.037 | 0.103   | 0.025                   |
| Waist Circumference (cm)         | 0.032                     | 0.027, 0.037   | <0.001       | 0.191                   | 0.005                     | -0.001, 0.011  | 0.077        | 0.026                   | 0.002                     | -0.003, 0.008 | 0.422   | 0.018                   |
| Systolic BP (per 10 mmHg)        | 0.147                     | 0.082, 0.212   | <0.001       | 0.040                   | 0.084                     | 0.020, 0.149   | <b>0.011</b> | 0.028                   | -0.036                    | -0.101, 0.029 | 0.275   | 0.022                   |
| Diastolic BP (per 10 mmHg)       | 0.200                     | 0.095, 0.304   | <0.001       | 0.031                   | 0.113                     | 0.009, 0.217   | <b>0.033</b> | 0.025                   | -0.077                    | -0.181, 0.027 | 0.148   | 0.023                   |
| HbA1c (%)                        | 0.417                     | 0.234, 0.599   | <0.001       | 0.039                   | -0.027                    | -0.211, 0.158  | 0.778        | 0.020                   | 0.150                     | -0.034, 0.335 | 0.110   | 0.025                   |
| FPG (per 10 mg/dL)               | 0.135                     | 0.054, 0.215   | <b>0.001</b> | 0.026                   | 0.075                     | -0.006, 0.155  | 0.069        | 0.024                   | 0.079                     | -0.002, 0.159 | 0.056   | 0.026                   |
| 2hrPG (per 10 mg/dL)             | 0.166                     | 0.139, 0.194   | <0.001       | 0.185                   | -0.152                    | -0.180, -0.124 | <0.001       | 0.166                   | 0.119                     | 0.090, 0.148  | <0.001  | 0.110                   |
| Triglycerides (per 10 mg/dL)     | 0.091                     | 0.075, 0.108   | <0.001       | 0.160                   | 0.009                     | -0.009, 0.027  | 0.349        | 0.021                   | 0.016                     | -0.002, 0.034 | 0.078   | 0.025                   |
| HDL Cholesterol (per 10 mg/dL)   | -0.085                    | -0.149, -0.021 | <b>0.010</b> | 0.022                   | -0.041                    | -0.105, 0.024  | 0.215        | 0.022                   | 0.007                     | -0.057, 0.071 | 0.825   | 0.021                   |
| LDL Cholesterol (per 10 mg/dL)   | 0.066                     | 0.037, 0.094   | <0.001       | 0.041                   | -0.008                    | -0.037, 0.021  | 0.587        | 0.020                   | 0.019                     | -0.010, 0.048 | 0.191   | 0.023                   |
| Total Cholesterol (per 10 mg/dL) | 0.038                     | 0.012, 0.064   | <b>0.005</b> | 0.024                   | -0.015                    | -0.041, 0.011  | 0.268        | 0.021                   | 0.020                     | -0.006, 0.046 | 0.141   | 0.024                   |

Abbreviations: FPC, functional principal component; BMI, body mass index; BP, blood pressure; HbA1c, hemoglobin A1c; HDL, high-density lipoprotein; LDL, low-density lipoprotein; FPG, fasting plasma glucose; 2hrPG, 2-hour plasma glucose

1. Model adjusted for age, sex, race, and ethnicity. Each independent variable (rows) and FPC (columns) combination represents a distinct regression model. Betas are interpreted as adjusted increase in each insulin FPC per unit (or 10 unit) change in the metabolic health parameter. Variable-specific missingness existed for BP (n = 21), waist circumference (n = 24), and lipid labs (n = 10).

**Table S6. Longitudinal subset participant characteristics at baseline, comparison to cross-sectional sample**

| Characteristic                   | Participants in longitudinal subset, <sup>1</sup> N = 193 <sup>2</sup> | Participants in cross-sectional sample only, N = 478 <sup>2</sup> | p-value <sup>3</sup> |
|----------------------------------|------------------------------------------------------------------------|-------------------------------------------------------------------|----------------------|
| <b>Age (Years)</b>               | 13.3 [11.5, 15.3]                                                      | 13.5 [11.6, 15.4]                                                 | 0.229                |
| <b>Sex</b>                       |                                                                        |                                                                   | 0.549                |
| <i>Female</i>                    | 108 (56%)                                                              | 254 (53%)                                                         |                      |
| <i>Male</i>                      | 85 (44%)                                                               | 224 (47%)                                                         |                      |
| <b>Race</b>                      |                                                                        |                                                                   | 0.006                |
| <i>White</i>                     | 104 (54%)                                                              | 282 (59%)                                                         |                      |
| <i>Black or African American</i> | 55 (28%)                                                               | 157 (33%)                                                         |                      |
| <i>Other/Multiracial</i>         | 24 (12%)                                                               | 28 (5.9%)                                                         |                      |
| <i>Unknown</i>                   | 10 (5.2%)                                                              | 11 (2.3%)                                                         |                      |
| <b>Ethnicity</b>                 |                                                                        |                                                                   | 0.100                |
| <i>Non-Hispanic/Latino</i>       | 177 (92%)                                                              | 455 (95%)                                                         |                      |
| <i>Hispanic/Latino</i>           | 16 (8.3%)                                                              | 23 (4.8%)                                                         |                      |
| <b>BMI Percentile</b>            | 96.2 [92.1, 98.6]                                                      | 97.3 (94.6, 98.9)                                                 | 0.005                |
| <b>FPG (mg/dL)</b>               | 83 [79, 90]                                                            | 91 [85, 97]                                                       | <0.001               |
| <b>2hrPG (mg/dL)</b>             | 99 [86, 114]                                                           | 112 [98, 128]                                                     | <0.001               |
| <b>HbA1c (%)</b>                 | 5.2 [5.0, 5.4]                                                         | 5.4 [5.2, 5.7]                                                    | <0.001               |
| <b>Baseline Dysglycemia</b>      |                                                                        |                                                                   | <0.001               |
| <i>No</i>                        | 179 (93%)                                                              | 340 (71%)                                                         |                      |
| <i>Yes</i>                       | 14 (7.3%)                                                              | 138 (29%)                                                         |                      |

Abbreviations: BMI, body mass index; FPG, fasting plasma glucose; 2hrPG, 2-hour plasma glucose; HbA1c, hemoglobin A1c; Q1, 1<sup>st</sup> quartile; Q3, 3<sup>rd</sup> quartile.

1. The Longitudinal subset is defined as participants with baseline and follow up data for whom at least six months passed between visits.

2. Median [Q1, Q3] or n (%).

3. Wilcoxon rank sum test (continuous characteristics) or Fisher's exact test (categorical characteristics).
